# Supplementary material for: Spatial and temporal variability of micropollutants within a wastewater catchment system
Source: Royal Society of Chemistry journal article supplement (doi:10.1039/d3em00361b), 2023-12-13
Supplement: d3em00361b1.pdf [file d3em00361b1.pdf]

## Supporting Information

### Spatial and Temporal Variability of Micropollutants Within a Wastewater Catchment System

*Madison Hattaway*<sup>a</sup>, *Chris Alaimo*<sup>a</sup>, *Luann Wong*<sup>a</sup>, *Jennifer Teerlink*<sup>b</sup>, *Thomas Young*<sup>a</sup>

<sup>a</sup>Department of Civil and Environmental Engineering, University of California, Davis  
Davis, CA, 95616, United States

<sup>b</sup>California Department of Pesticide Regulation, Sacramento, CA, 95618

## CONTENTS

### List of Figures

|                                                               |     |
|---------------------------------------------------------------|-----|
| Figure S1. Schematic of connections within sewer system       | S2  |
| Figure S2. tMS/MS for feature identified as acetaminophen     | S14 |
| Figure S3. tMS/MS for feature identified as mycophenolic acid | S15 |
| Figure S4. tMS/MS for feature identified as piperine          | S16 |

### List of Tables

|                                                                                                  |     |
|--------------------------------------------------------------------------------------------------|-----|
| Table S1: LC-QTOF-MS parameters for All Ions acquisition and targeted MS/MS (tMS/MS) acquisition | S3  |
| Table S2: General MS-DIAL alignment parameters for tMS/MS and All Ions data                      | S4  |
| Table S3: Labelled internal standards used for retention time alignment in MS-DIAL               | S6  |
| Table S4: MSFINDER settings                                                                      | S7  |
| Table S5: GC-QTOF-MS instrumental parameters                                                     | S8  |
| Table S6: LC target compounds detection in standards and spikes                                  | S9  |
| Table S7: GC target compounds detection in standards and spikes                                  | S10 |
| Table S8: Suspect-annotated LC compounds and level of identification confidence, if achieved     | S10 |
| Table S9: GC suspect-identified compounds and detection frequencies                              | S12 |
| Table S10: Acetaminophen: library fragments and average mass error                               | S14 |
| Table S11: Mycophenolic acid: library fragments and average mass error                           | S15 |
| Table S12: Piperine: library fragments and average mass error                                    | S16 |

## Supplemental Experimental

### Sample Collection

Briefly, samples were collected as twenty-four-hour time-weighted composites at the wastewater treatment plant influent, effluent, and seven sub-catchment locations before the treatment plant.

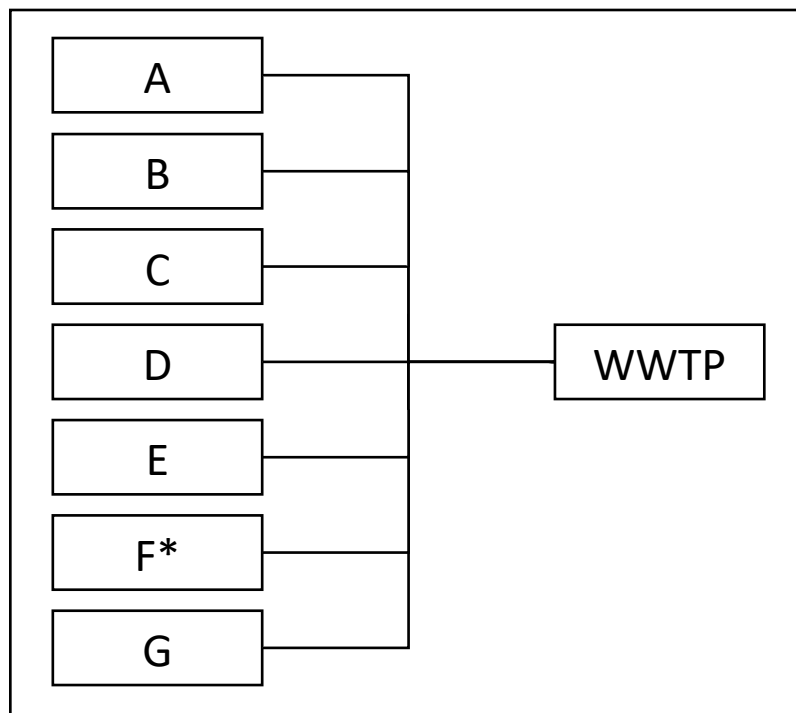

**Figure S1.** Schematic of connections within sewer system. Trunkline sites A, B, C, D, E, G, plus combined influent and treated effluent of the WWTP were sampled monthly. \*F for one less month than other sites and is thus omitted from this analysis.

### Liquid Chromatography and Mass Spectrometry

Data was acquired using an Agilent 1260 Infinity HPLC coupled to an Agilent 6530 QTOF-MS. Chromatographic separation was achieved with a Zorbax Eclipse Plus C18 column (100 mm, 2.5 mm, 1.8  $\mu\text{m}$ , Agilent Technologies, Inc.) Ultra-pure water plus 0.1% (v/v) formic acid (A), and acetonitrile plus 0.1% (v/v) formic acid (B) were used as mobile phases for positive electrospray ionization. The initial gradient was held at 2% B for 1.5 minutes, followed by a linear increase to 100% B at 16.5 min and held for 4 min. A post-run column equilibrium time of 3 minutes was used resulting in a total run time of 23.5 minutes. Instrumental parameters are included in Table S1. Data acquisition was done using *All-Ions* fragmentation method (data independent acquisition).

### Gas Chromatography Mass Spectrometry

Extracts prepared for analysis on the GC-QTOF-MS (Agilent 7890B GC coupled to an Agilent QTOF/MS 7200B with a HP-5MS 30 m  $\times$  0.25 mm, 0.25  $\mu\text{m}$  column, Agilent Technologies, Inc.) were run once in negative chemical ionization (NCI) mode using methane as collision gas and a second time in electron ionization (EI) mode.

### Method Evaluation, Quality Assurance, and Quality Control Measures

Prior to applying this analytical method to the wastewater samples tested here, the performance of the method was evaluated for 22 pesticides in wastewater influent samples analyzed in positive electrospray ionization mode. Recoveries of spiked compounds ranged from 57-120% with an average of 89% recovery, and method detection limits were between 4 and 34 ng/L. Quality assurance and quality control measures applied during the study included preparation and analysis of one method blank sample and one matrix spike duplicate in each monthly batch of 8 samples. Performance of the overall method for nontarget feature extraction was evaluated by assessing the ability to align, recover spectra, and identify compounds in the matrix spike samples. When spiked at 100 ppb into wastewater influent, the alignment and deconvolution algorithms correctly isolated and identified 100% of the spiked compounds in for 19/23 compounds, with high detection frequencies for most of the remaining compounds and was over 50% effective for 18/23 compounds spiked at 20 ppb (Table S6).

**Table S1:** LC-QTOF-MS parameters for All Ions acquisition and targeted MS/MS (tMS/MS) acquisition

|                              |                                                       |
|------------------------------|-------------------------------------------------------|
| Agilent 6530 QTOF            |                                                       |
| Injection volume (µL)        | 20                                                    |
| <b>LC settings</b>           |                                                       |
| <i>Mobile phase</i>          |                                                       |
| A (pos)                      | milliQ water + 0.1% formic acid                       |
| B (pos)                      | Acetonitrile + 0.1% formic acid                       |
| Solvent flow (µL/min)        | 350                                                   |
| Gradient                     |                                                       |
|                              | 2% B for 1.5 min                                      |
|                              | 2-100% B for 15 min                                   |
|                              | 100% B for 5 min                                      |
|                              | Equilibration to initial conditions for 3 min         |
| Column                       | Zorbax Eclipse Plus (2.5 mm ID, 1.8 µm particle size) |
| Guard-column                 | Zorbax Eclipse Plus (2.5 mm ID, 1.8 µm particle size) |
| Column temperature (°C)      | 30                                                    |
| <b>Source parameters</b>     |                                                       |
| Gas temperature (°C)         | 300                                                   |
| Gas flow rate (L/min)        | 12                                                    |
| Nebulizer (psi)              | 25                                                    |
| Sheath gas temperature (°C)  | 350                                                   |
| Sheath gas flow rate (L/min) | 11                                                    |
| Capillary (V)                | 3000                                                  |
| Nozzle voltage (V)           | 1500                                                  |
| Fragmentor (V)               | 110                                                   |
| Skimmer (V)                  | 65                                                    |
| Cell RF (eV)                 | 0,10, 20, 40                                          |
| Octopole RF (V)              | 750                                                   |
| <b>MS Settings</b>           |                                                       |
| Gas temperature (°C)         | 300                                                   |
| Drying gas flow rate (L/min) | 12                                                    |
| Nebulizer (psig)             | 25                                                    |
| Sheath gas temperature (°C)  | 350                                                   |
| Sheath gas flow rate (L/min) | 11                                                    |
| Vcap                         | 3500                                                  |
| Fragmentor (V)               | 110                                                   |

|                                                        |                    |
|--------------------------------------------------------|--------------------|
| Reference mass correction                              | 121.0509, 922.0098 |
| <b>All Ions Data independent acquisition (DIA)</b>     |                    |
| Scan range                                             | 50-1050 m/z        |
| Scan speed                                             | 4 spectra/s        |
| Collision energies (eV)                                | 0, 10, 20, 40      |
| <b>Targeted MS/MS Data dependent acquisition (DDA)</b> |                    |
| <i>MS1</i>                                             |                    |
| Scan range                                             | 30-1050 m/z        |
| Scan speed                                             | 4 spectra/s        |
| Collision energies (eV)                                | 0                  |
| Maximum time between MS (s)                            | 3                  |
| <i>MS2</i>                                             |                    |
| Scan range MS2                                         | 30-1050 M/Z        |
| Scan speed                                             | 6 spectra/s        |
| Collision energies (eV)                                | 0, 10, 20, 40      |
| Retention time window (min)                            | 0.8                |
| Isotopic width                                         | Narrow (1.3 m/z)   |
| Z                                                      | 1                  |

**Table S2:** General MS-DIAL alignment parameters for tMS/MS and All Ions data

|                                   | tMS/MS                      | All Ions                    |
|-----------------------------------|-----------------------------|-----------------------------|
| <b>Project</b>                    |                             |                             |
| MS1 Data type                     | Profile                     | Profile                     |
| MS2 Data type                     | Centroid                    | Profile                     |
| Ion mode                          | Positive                    | Positive                    |
| Target                            | Metabolomics                | Metabolomics                |
| Mode                              | ddMSMS                      | diMSMS                      |
| <b>Data collection parameters</b> |                             |                             |
| Retention time begin              | 4                           | 0                           |
| Retention time end                | 100                         | 100                         |
| Mass range begin                  | 0                           | 0                           |
| Mass range end                    | 2000                        | 5000                        |
| MS2 mass range begin              | 0                           | 0                           |
| MS2 mass range end                | 2000                        | 0                           |
| <b>Centroid parameters</b>        |                             |                             |
| MS1 tolerance                     | 0.01                        | 0.01                        |
| MS2 tolerance                     | 0.025                       | 0.025                       |
| <b>Isotope recognition</b>        |                             |                             |
| Maximum charged number            | 2                           | 2                           |
| <b>Data processing</b>            |                             |                             |
| Number of threads                 | 5                           | 5                           |
| <b>Peak detection parameters</b>  |                             |                             |
| Smoothing method                  | LinearWeightedMovingAverage | LinearWeightedMovingAverage |

|                                                                                           |                                    |                                    |
|-------------------------------------------------------------------------------------------|------------------------------------|------------------------------------|
| Smoothing level                                                                           | 3                                  | 3                                  |
| Minimum peak width                                                                        | 5                                  | 5                                  |
| Minimum peak height                                                                       | 3000                               | 3000                               |
| <b>Peak spotting parameters</b>                                                           |                                    |                                    |
| Mass slice width                                                                          | 0.1                                | 0.1                                |
| Exclusion mass list (mass & tolerance)                                                    |                                    |                                    |
| <b>Deconvolution parameters</b>                                                           |                                    |                                    |
| Sigma window value                                                                        | 0.5                                | 0.5                                |
| MS2Dec amplitude cut off                                                                  | 0                                  | 0                                  |
| Exclude after precursor                                                                   | TRUE                               | TRUE                               |
| Keep isotope until                                                                        | 0.5                                | 0.5                                |
| Keep original precursor isotopes                                                          | FALSE                              | FALSE                              |
| <b>MSP file and MS/MS identification setting</b>                                          |                                    |                                    |
| MSP file                                                                                  | MergedPCDL_AllSpectra_Positive.msp | MergedPCDL_AllSpectra_Positive.msp |
| Retention time tolerance                                                                  | 100                                | 100                                |
| Accurate mass tolerance (MS1)                                                             | 0.01                               | 0.01                               |
| Accurate mass tolerance (MS2)                                                             | 0.05                               | 0.05                               |
| Identification score cut off                                                              | 80                                 | 80                                 |
| Using retention time for scoring                                                          | FALSE                              | TRUE                               |
| Using retention time for filtering                                                        | FALSE                              | FALSE                              |
| <b>Text file and post identification (retention time and accurate mass based) setting</b> |                                    |                                    |
| Text file                                                                                 |                                    |                                    |
| Retention time tolerance                                                                  | 0.1                                | 0.1                                |
| Accurate mass tolerance                                                                   | 0.01                               | 0.01                               |
| Identification score cut off                                                              | 85                                 | 85                                 |
| <b>Advanced setting for identification</b>                                                |                                    |                                    |
| Relative abundance cut off                                                                | 0                                  | 0                                  |
| Top candidate report                                                                      | FALSE                              | TRUE                               |
| <b>Adduct ion setting</b>                                                                 |                                    |                                    |
| [M+H] <sup>+</sup>                                                                        |                                    |                                    |

[M+NH4]<sup>+</sup>

[M+Na]<sup>+</sup>

| <b>Alignment parameters setting</b>                     |                        |                        |
|---------------------------------------------------------|------------------------|------------------------|
| Reference file                                          | (varies for alignment) | (varies for alignment) |
| Retention time tolerance                                | 0.05                   | 0.05                   |
| MS1 tolerance                                           | 0.015                  | 0.015                  |
| Retention time factor                                   | 0.5                    | 0.5                    |
| MS1 factor                                              | 0.5                    | 0.5                    |
| Peak count filter                                       | 0                      | 0                      |
| N% detected in at least one group                       | 0                      | 0                      |
| Remove feature based on peak height fold-change         | FALSE                  | FALSE                  |
| Sample max / blank average                              | 5                      | 5                      |
| Sample average / blank average                          | 5                      | 5                      |
| Keep identified and annotated metabolites               | TRUE                   | TRUE                   |
| Keep removable features and assign the tag for checking | TRUE                   | TRUE                   |
| Gap filling by compulsion                               | FALSE                  | TRUE                   |
| <b>Tracking of isotope labels</b>                       |                        |                        |
| Tracking of isotopic labels                             | FALSE                  | FALSE                  |
| <b>Ion mobility</b>                                     |                        |                        |
| Ion mobility data                                       | FALSE                  | FALSE                  |

**Table S3:** Labelled internal standards used for retention time alignment in MS-DIAL

| <b>Compound</b> | <b>Rt (min)</b> | <b>Rt tol. (min)</b> | <b>m/z</b> | <b>m/z tol. (Da)</b> | <b>Min. Height</b> | <b>Use</b> |
|-----------------|-----------------|----------------------|------------|----------------------|--------------------|------------|
| Methomyl-D3     | 6.65            | 0.2                  | 166.0721   | 0.025                | 5000               | T          |
| Simazine-D5     | 9.5             | 0.2                  | 207.1163   | 0.025                | 5000               | T          |
| Dimethoate-D6   | 8.16            | 0.2                  | 236.0443   | 0.025                | 5000               | T          |
| Diuron-D6       | 10.89           | 0.2                  | 239.0618   | 0.025                | 5000               | T          |
| Imidacloprid-D4 | 8.01            | 0.2                  | 260.0858   | 0.025                | 5000               | T          |
| Pendimeth-D5    | 15.9            | 0.2                  | 287.1775   | 0.025                | 5000               | T          |
| Boscalid-D4     | 12.69           | 0.2                  | 347.0651   | 0.025                | 5000               | T          |

**Table S4:** MSFINDER settings

|                                                               |                                                    |
|---------------------------------------------------------------|----------------------------------------------------|
| <b>Formula finder parameters</b>                              |                                                    |
| LEWIS and SENIOR CHECK                                        | Yes                                                |
| Ms1 Tolerance                                                 | 10                                                 |
| Isotopic Abundance Tolerance                                  | 20                                                 |
| Mass tolerance type                                           | ppm                                                |
| Element Ratio Check                                           | Common Range                                       |
| Extended Range                                                | FALSE                                              |
| Extreme Range                                                 | FALSE                                              |
| Element Probability Check                                     | Yes                                                |
| Element selection                                             | O, N, P, S, F, Cl, Br, I                           |
| <b>Structure finder parameters</b>                            |                                                    |
| TreeDepth                                                     | 2                                                  |
| MS2 tolerance                                                 | 20                                                 |
| Relative Abundance Cut Off                                    | 5%                                                 |
| <b>Data source</b>                                            |                                                    |
| <u>MINEs (Metabolic In Silico Network Expansions) setting</u> | Never use it                                       |
| <u>PubChem Online setting</u>                                 | Only use when there is no query in local databases |
| <i>Local Databases</i>                                        |                                                    |
| HMDB (Human)                                                  |                                                    |
| YMDB (Yeast)                                                  |                                                    |
| PubChem                                                       |                                                    |
| SMPDB (Human)                                                 |                                                    |
| UNPD (Natural Product)                                        |                                                    |
| ChEBI (Biomolecules)                                          |                                                    |
| PlantCyc (Plant)                                              |                                                    |
| KNAPSAcK (Natural Product)                                    |                                                    |
| BMDB (Bovine)                                                 |                                                    |
| FoodDB (Food)                                                 |                                                    |
| ECMDB (E.coli)                                                |                                                    |
| DrugBank (Drug)                                               |                                                    |
| T3DB (Toxin)                                                  |                                                    |
| STOFF (Environment)                                           |                                                    |
| NANPDB (Natural Product)                                      |                                                    |
| LipidMAPS (Lipids)                                            |                                                    |
| Urine (Human)                                                 |                                                    |
| Saliva (Human)                                                |                                                    |
| Feces (Human)                                                 |                                                    |
| Serum (Human)                                                 |                                                    |
| CSF (Human)                                                   |                                                    |
| User Defined DB: PubChemLite                                  |                                                    |

Table S5: GC-QTOF-MS instrumental parameters

|                                  |                                                    |
|----------------------------------|----------------------------------------------------|
| <b><u>GC-NCI-MS Method</u></b>   |                                                    |
| Injection Volume                 | 2.5 $\mu$ L                                        |
| Injection Mode                   | splitless                                          |
| Purge Flow to Split Vent         | 33 mL/min at 0.75 min                              |
| Inlet Temperature                | 280 °C                                             |
|                                  |                                                    |
| <b>GC Settings</b>               |                                                    |
| Column                           | HP-5MS (30m x 0.25mm, 025 $\mu$ m)                 |
| Initial Oven Temperature         | 100 °C, hold 1 min                                 |
| Ramp 1                           | 15°C/min to 200 °C                                 |
| Ramp 2                           | 3.8 °C/min to 290 °C                               |
| Ramp 3                           | 10 °C/min to 300 °C, hold 4 min                    |
| He Flow                          | 1.35 mL/min, constant flow                         |
| Transfer Line Temperature        | 300 °C                                             |
|                                  |                                                    |
| <b>MS Settings</b>               |                                                    |
| N2 Collision Gas                 | 1.5 ml/min                                         |
| Reactant Gas (Methane)           | 40%                                                |
|                                  |                                                    |
| Source Temperature               | 200 °C                                             |
| Emmission Current Filament       | 90 $\mu$ A                                         |
| Electron Energy                  | 70 eV                                              |
| Scan Range                       | 35-1000 m/z                                        |
| Scan Speed                       | 3 spectra/sec                                      |
| Reference Mass Correction        | internal mass correction after every second sample |
|                                  |                                                    |
| <b><u>GC-EI-MS Method</u></b>    |                                                    |
| Injection Volume                 | 2.5 $\mu$ L                                        |
| Injection Mode                   | splitless                                          |
| Purge Flow to Split Vent         | 33 mL/min at 0.75 min                              |
| Inlet Temperature                | 280 °C                                             |
|                                  |                                                    |
| <b>GC Settings</b>               |                                                    |
| Column                           | HP-5MS (30m x 0.25mm, 025 $\mu$ m)                 |
| Initial Oven Temperature         | 60 °C, hold 1 min                                  |
| Ramp 1                           | 40 °C/min to 120 °C                                |
| Ramp 2                           | 5 °C/min to 310 °C                                 |
| Optimized He Flow for RT locking | 0.776 mL/min, constant flow                        |
| Transfer Line Temperature        | 280 °C                                             |
|                                  |                                                    |
| <b>MS Settings</b>               |                                                    |



|                           |                                                    |
|---------------------------|----------------------------------------------------|
| N2 Collision Gas          | 1.5 ml/min                                         |
| Source Temperature        | 300 °C                                             |
| Emission Current Filament | 35 µA                                              |
| Electron Energy           | 70 eV                                              |
| Scan Range                | 35-1000 m/z                                        |
| Scan Speed                | 4 spectra/sec                                      |
| Reference Mass Correction | internal mass correction after every second sample |

## Supplemental Results

**Table S6:** Target compound detection in standards and spiked wastewater after MS-DIAL alignment

| Compound            | Detection Frequency in 100 ppb Standards <sup>1</sup> (%) (n = 4) | Detection Frequency in 20 ppb Spikes <sup>2</sup> (%) (n = 10) | Detection Code <sup>3</sup> |
|---------------------|-------------------------------------------------------------------|----------------------------------------------------------------|-----------------------------|
| Azoxystrobin        | 100                                                               | 90                                                             | C                           |
| Boscalid            | 100                                                               | 90                                                             | U                           |
| Chlorantraniliprole | 100                                                               | 80                                                             | C                           |
| Clomazone           | 100                                                               | 90                                                             | C                           |
| Cyprodinil          | 100 <sup>4</sup>                                                  | 100 <sup>4</sup>                                               | U                           |
| DEET                | 100                                                               | 90                                                             | C                           |
| Difenoconazole      | 100                                                               | 90                                                             | C                           |
| Dimethoate          | 100                                                               | 90                                                             | U                           |
| Diuron              | 100                                                               | 90                                                             | U                           |
| Hexazinone          | 100                                                               | 90                                                             | C                           |
| Imidacloprid        | 100                                                               | 90                                                             | U                           |
| Methomyl            | 100                                                               | 60                                                             | U                           |
| Methoxyfenozide     | 75                                                                | 60                                                             | U                           |
| Metolachlor         | 100                                                               | 90                                                             | C                           |
| Pendimethalin       | 100                                                               | 40                                                             | U                           |
| Propanil            | 100                                                               | 90                                                             | C                           |
| Propoxur            | 100                                                               | 80                                                             | C                           |
| Pyriproxyfen        | 100                                                               | 80                                                             | C                           |
| Simazine            | 100                                                               | 90                                                             | C                           |
| Thiacloprid         | 100                                                               | 90                                                             | U                           |
| Thiamethoxam        | 100                                                               | 80                                                             | U                           |
| Thiobencarb         | 100                                                               | 70                                                             | I                           |
| Triclocarban        | 100                                                               | 40                                                             | U                           |

<sup>1</sup> Triclosan concentration: 10 ppb.

<sup>2</sup> Fipronil concentration: 4 ppb. Pyriproxyfen concentration: 24 ppb. Triclosan concentration: 2 ppb.

<sup>3</sup> C: Compounds Identified correctly; I: Compounds identified as isomers; U: Compounds identified as Unknown but the correct compounds are in the top five hits under Compound Search.

**Table S7:** GC target compounds detection in standards and spikes

| Compounds                        | Ion Mode | Detection Frequency in 250 ppb Standards (%) | Detection Frequency in 100 ppb Spikes <sup>1</sup> (%) | Detection Code <sup>2</sup> |
|----------------------------------|----------|----------------------------------------------|--------------------------------------------------------|-----------------------------|
| <b>Non-pyrethroid pesticides</b> |          |                                              |                                                        |                             |
| Chlorothalonil                   | GC-EI    | 67                                           | 0                                                      | C                           |
| Chlorpyrifos                     | GC-EI    | 100                                          | 30                                                     | C                           |
| Pyriproxyfen                     | GC-EI    | 100                                          | 90 <sup>3</sup>                                        | C                           |
| <b>Pyrethroid Insecticides</b>   |          |                                              |                                                        |                             |
| Bifenthrin                       | GC-EI    | 0                                            | 0                                                      | N                           |
| Bioallethrin                     | GC-EI    | 0                                            | 0                                                      | N                           |
| Cyhalothrin                      | GC-EI    | 100                                          | 20                                                     | C                           |
| Cypermethrin                     | GC-EI    | 67                                           | 0                                                      | C                           |
| Deltamethrin                     | GC-EI    | 0                                            | 0                                                      | N                           |
| Esfenvalerate                    | GC-EI    | 100                                          | 0                                                      | C                           |
| Etofenprox                       | GC-EI    | 0                                            | 0                                                      | N                           |
| Imiprothrin                      | GC-EI    | 0                                            | 0                                                      | N                           |
| Permethrin                       | GC-EI    | 100                                          | 70                                                     | C                           |
| Phenothrin                       | GC-EI    | 100                                          | 50                                                     | C                           |
| Prallethrin                      | GC-EI    | 0                                            | 0                                                      | N                           |
| Resmethrin                       | GC-EI    | 100                                          | 50                                                     | C                           |
| Tetremethrin                     | GC-EI    | 0                                            | 0                                                      | N                           |

<sup>1</sup>Pyriproxyfen concentration: 600 ppb.

<sup>2</sup>C: Compounds identified correctly. N: Compounds that are not identified.

<sup>3</sup>More than one entry. Summed the numbers detected in all entries. (Total: 3 standards, 10 spikes)

**Table S8:** Suspect-annotated LC compounds with agreement between MS-DIAL and *Qualitative Analysis* and level of identification confidence, if achieved

| Compound                         | Use Category                      | ID Level of Confidence | Detection frequency <sup>1</sup> (n = 56) |
|----------------------------------|-----------------------------------|------------------------|-------------------------------------------|
| DEET / Diethyltoluamide          | Pesticide                         | 1                      | 89%                                       |
| Valsartan                        | Pharmaceutical- anti-hypertensive | 1                      | 73%                                       |
| Caffeine                         | Food                              | 1                      | 68%                                       |
| Oleamide                         | Multi- food packaging; lubricants | 1                      | 61%                                       |
| Acetaminophen                    | Pharmaceutical- NSAID             | 2a                     | 57%                                       |
| Mycophenolic acid                | Pharmaceutical- immunosuppressant | 2a                     | 54%                                       |
| Hydrocortisone (Cortisol)        | Pharmaceutical                    |                        | 43%                                       |
| BTA / Benzotriazole <sup>2</sup> | Cleaning product                  |                        | 41%                                       |
| Benzoyllecgonine                 | Metabolite- cocaine               |                        | 36%                                       |

|                                       |                               |    |     |
|---------------------------------------|-------------------------------|----|-----|
| 1-(3-Trifluoromethylphenyl)piperazine | Drug                          |    | 32% |
| DEP / Diethyl phthalate               | Plasticizer                   | 1  | 32% |
| Gabapentin                            | Pharmaceutical                |    | 29% |
| Fexofenadine                          | Pharmaceutical- antihistamine | 1  | 25% |
| Iohexol                               | Iodinated Xray Contrast       | 1  | 25% |
| Piperine                              | Natural product               | 2a | 25% |
| 2,6-Xylidine                          | Metabolite                    |    | 20% |
| TBEP / Tris(2-butoxyethyl) phosphate  | Flame retardant               | 1  | 16% |
| Octyl methoxycinnamate                | Fragrance                     |    | 14% |
| Bis(2-ethylhexyl) phthalate (DEHP)    | Plasticizer                   | 1  | 13% |
| Sulfamethoxazole                      | Pharmaceutical- antibiotic    | 1  | 13% |
| Metoprolol                            | Pharmaceutical- beta blocker  | 1  | 11% |
| Trimethoprim                          | Pharmaceutical- antibiotic    | 1  | 9%  |
| Ivermectin B1a                        | Vet                           |    | 7%  |
| Diethofencarb <sup>2</sup>            | Fungicide                     |    | 5%  |
| Carbamazepine                         | Pharmaceutical- anti-seizure  | 1  | 4%  |
| O-DT / O-Desmethyltramadol            | Metabolite                    | 1  | 2%  |
| TEP / Triethyl phosphate              | Flame retardant               |    | 2%  |

<sup>1</sup> In trunkline, WWTP influent and effluent

<sup>2</sup> Compared against analytical standards but not confirmed.

**Table S9:** GC suspect-identified compounds and detection frequencies

| Compound                                                  | Use Category                        | Mode | Detection frequency <sup>1</sup> (n = 56) | Groomer (n = 4) | Laundry (n = 4) | PCO (n = 4) |
|-----------------------------------------------------------|-------------------------------------|------|-------------------------------------------|-----------------|-----------------|-------------|
| Phenol, 2,2'-methylenebis[6-(1,1-dimethylethyl)-4-methyl- | Consumer product antioxidant        | EI   | 39.3%                                     | 25%             | 0%              | 25%         |
| Indole, 3-methyl-                                         | Endogenous                          | EI   | 91.1%                                     | 25%             | 25%             | 0%          |
| p-Cresol                                                  | Endogenous                          | EI   | 60.7%                                     | 25%             | 0%              | 0%          |
| Hippuric acid                                             | Endogenous                          | EI   | 44.6%                                     | 0%              | 25%             | 0%          |
| Allopregnane-3.alpha.,20.alpha.-diol                      | Endogenous                          | EI   | 35.7%                                     | 0%              | 25%             | 75%         |
| Cholestan-3-ol, (3.beta.,5.beta.)-                        | Endogenous                          | EI   | 30.4%                                     | 100%            | 75%             | 75%         |
| TCPP                                                      | Flame retardant                     | EI   | 75.0%                                     | 50%             | 75%             | 0%          |
| Oxybenzone                                                | Flavoring; Fragrance; Personal care | EI   | 96.4%                                     | 25%             | 0%              | 0%          |
| Benzoic acid                                              | Flavoring; Fragrance; Personal care | EI   | 76.8%                                     | 25%             | 0%              | 0%          |

|                                                    |                                           |    |       |      |      |     |
|----------------------------------------------------|-------------------------------------------|----|-------|------|------|-----|
| Heptasiloxane, hexadecamethyl-                     | Flavoring;<br>Fragrance;<br>Personal care | EI | 75.0% | 50%  | 100% | 50% |
| Triclosan                                          | Flavoring;<br>Fragrance;<br>Personal care | EI | 64.3% | 0%   | 25%  | 0%  |
| o-Cymene                                           | Flavoring;<br>Fragrance;<br>Personal care | EI | 60.7% | 0%   | 0%   | 0%  |
| Methylparaben                                      | Flavoring;<br>Fragrance;<br>Personal care | EI | 50.0% | 0%   | 25%  | 0%  |
| Dimethyl phthalate                                 | Flavoring;<br>Fragrance;<br>Personal care | EI | 44.6% | 25%  | 25%  | 50% |
| Methyl tetradecanoate                              | Flavoring;<br>Fragrance;<br>Personal care | EI | 44.6% | 100% | 100% | 50% |
| Benzene, 1-(1,1-dimethylethyl)-2-methoxy-4-methyl- | Flavoring;<br>Fragrance;<br>Personal care | EI | 37.5% | 0%   | 25%  | 0%  |
| Benzoic acid, 2-hydroxy-, pentyl ester             | Flavoring;<br>Fragrance;<br>Personal care | EI | 37.5% | 25%  | 0%   | 0%  |
| Tetrasiloxane, decamethyl-                         | Flavoring;<br>Fragrance;<br>Personal care | EI | 33.9% | 25%  | 0%   | 25% |
| Isobutyl paraben                                   | Flavoring;<br>Fragrance;<br>Personal care | EI | 32.1% | 0%   | 0%   | 0%  |
| Ethanol, 2-(4-chlorophenoxy)-                      | Flavoring;<br>Fragrance;<br>Personal care | EI | 30.4% | 25%  | 75%  | 50% |
| 1H-Indene, 2,3-dihydro-1,1,3-trimethyl-3-phenyl-   | Flavoring;<br>Fragrance;<br>Personal care | EI | 25.0% | 50%  | 50%  | 25% |
| 2(3H)-Furanone, 5-heptyldihydro-                   | Flavoring;<br>Fragrance;<br>Personal care | EI | 21.4% | 0%   | 25%  | 25% |
| D-Limonene                                         | Food                                      | EI | 94.6% | 25%  | 50%  | 0%  |
| aR-Turmerone                                       | Food                                      | EI | 35.7% | 100% | 75%  | 50% |
| Stigmasta-5,24(28)-dien-3-ol, (3.beta.,24Z)-       | Food                                      | EI | 25.0% | 25%  | 0%   | 0%  |
| Phenol, 3-methyl-                                  | Human xenobiotic metabolite               | EI | 96.4% | 75%  | 100% | 75% |
| 2-Naphthalenol                                     | Human xenobiotic metabolite               | EI | 30.4% | 0%   | 50%  | 0%  |

|                         |                |     |       |      |      |     |
|-------------------------|----------------|-----|-------|------|------|-----|
| 1,2-Dichlorobenzene     | Industrial     | NCI | 39.3% | 50%  | 50%  | 50% |
| Lilial                  | Pesticide      | EI  | 55.4% | 0%   | 75%  | 0%  |
| o-Hydroxybiphenyl       | Pesticide      | EI  | 50.0% | 0%   | 0%   | 0%  |
| Dichlorvos              | Pesticide      | NCI | 48.2% | 100% | 100% | 75% |
| Parathion-methyl        | Pesticide      | NCI | 21.4% | 25%  | 0%   | 25% |
| Etiracetam              | Pharmaceutical | EI  | 82.1% | 75%  | 100% | 25% |
| Iminostilbene           | Pharmaceutical | EI  | 76.8% | 25%  | 25%  | 0%  |
| Ibuprofen               | Pharmaceutical | EI  | 51.8% | 100% | 100% | 75% |
| Gabapentin              | Pharmaceutical | EI  | 41.1% | 0%   | 0%   | 0%  |
| Guaiifenesin            | Pharmaceutical | EI  | 28.6% | 0%   | 0%   | 0%  |
| Stigmastanol            | Pharmaceutical | EI  | 26.8% | 0%   | 0%   | 0%  |
| 9,12,15-Octadecatrienol | Plastics       | EI  | 69.6% | 50%  | 50%  | 25% |

<sup>1</sup> Trunkline, influent, & effluent

## Targeted MS/MS structure results

### Acetaminophen

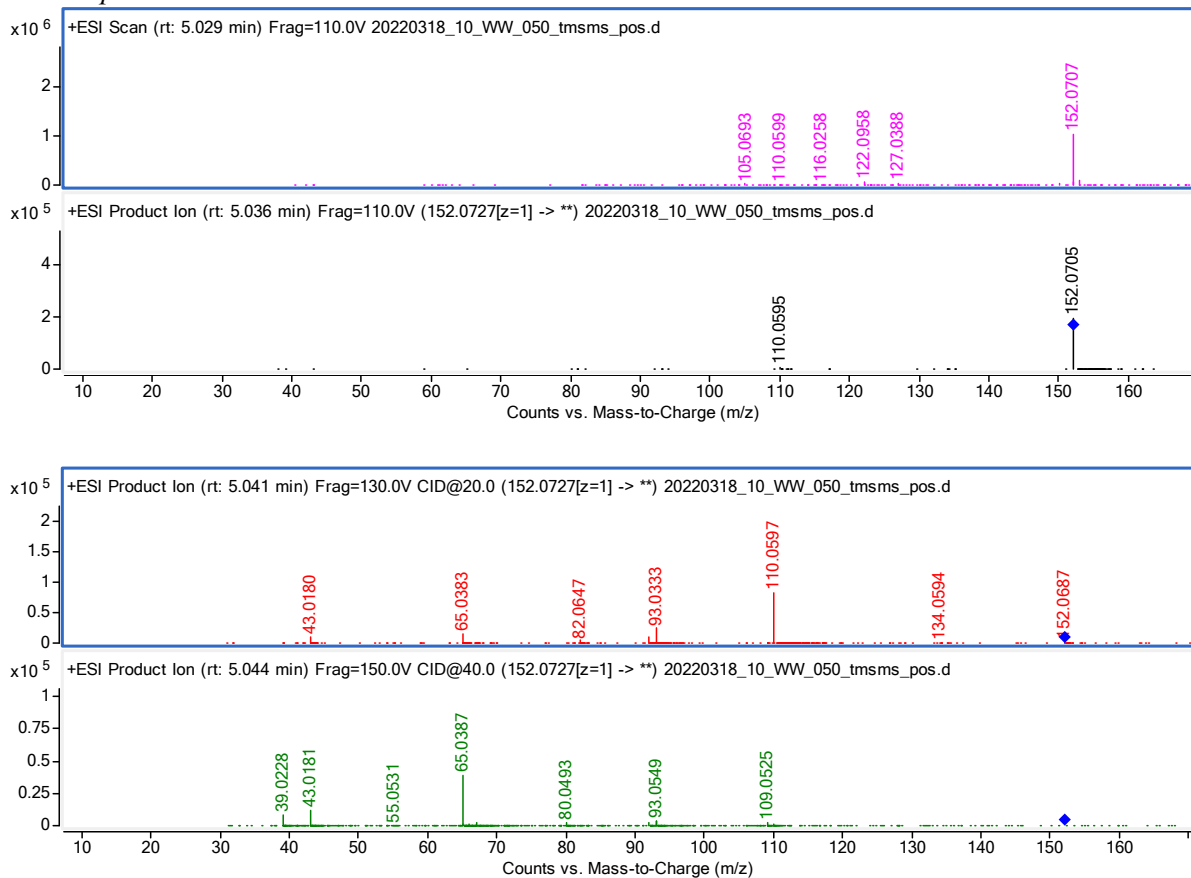

**Figure S2.** tMS/MS at collision energies of 0, 10, 20, and 40 eV for the feature identified at 2a confidence level as acetaminophen.

**Table S10:** Acetaminophen: library fragments and average mass error

| Library Fragment<br>m/z* | Average mass<br>error (ppm) |
|--------------------------|-----------------------------|
| 152.0716                 | -6.58                       |
| 110.0622                 | -23.62                      |
| 65.0389                  | -6.15                       |

\*from MassBank Europe: <https://massbank.eu/MassBank/Result.jsp?inchikey=RZVAJINKPMORJF-UHFFFAOYSA-N>

*Mycophenolic acid*

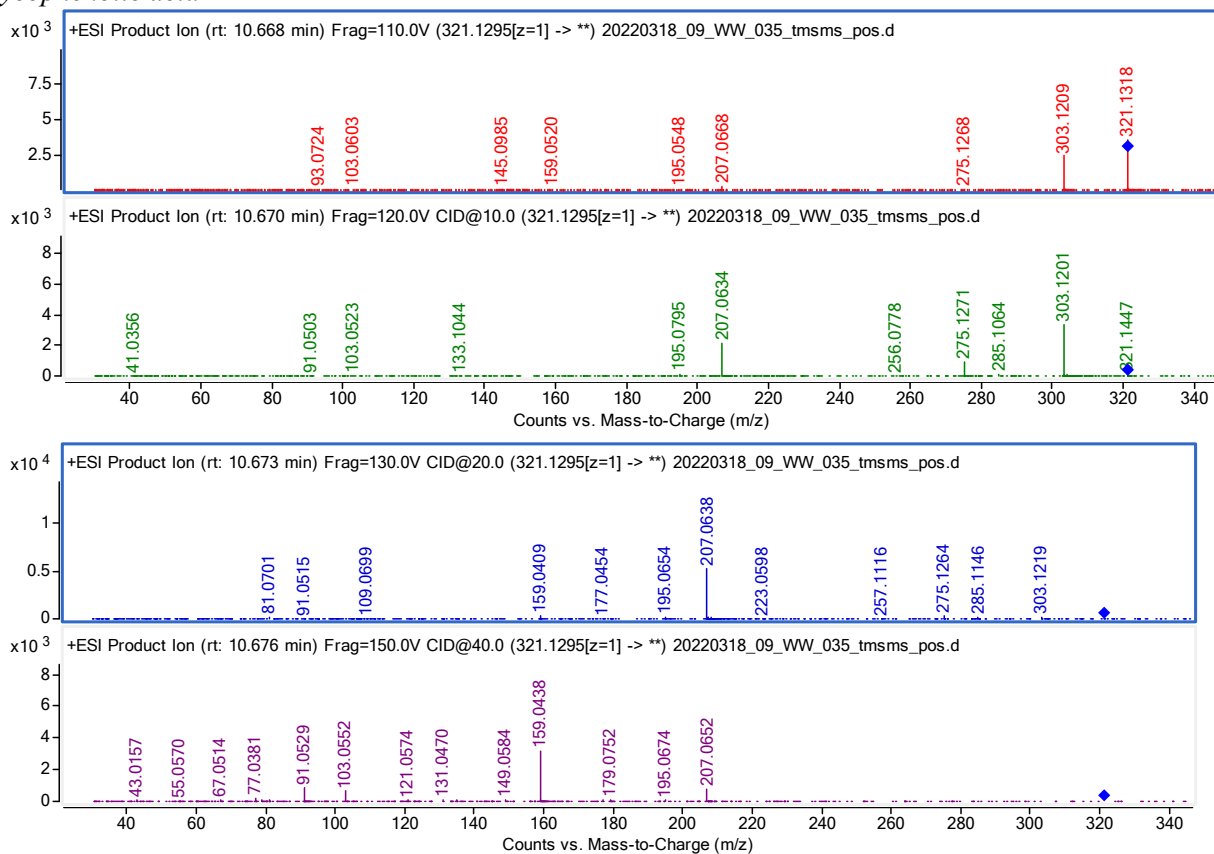

**Figure S3.** tMS/MS at collision energies of 0, 10, 20, and 40 eV for the feature identified at 2a confidence level as mycophenolic acid.

**Table S11:** Mycophenolic acid: library fragments and average mass error

| Library Fragment m/z* | Average mass error (ppm) |
|-----------------------|--------------------------|
| 321.1299              | 6.066082                 |
| 303.1225              | -6.48913                 |
| 207.0644              | -3.97461                 |
| 159.0397              | 16.9266                  |

\*Library spectrum from Human Metabolome Database:  
<https://hmdb.ca/metabolites/HMDB0015159#spectra>

## Piperine

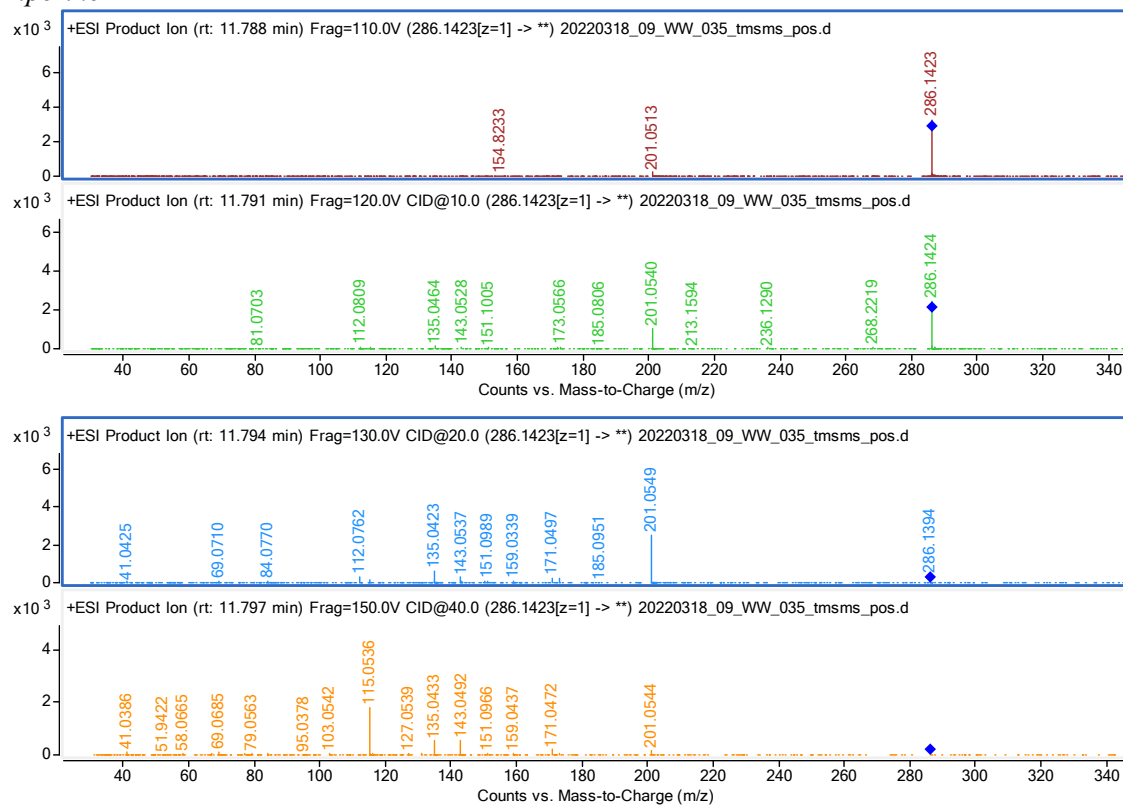

**Figure S4.** tMS/MS at collision energies of 0, 10, 20, and 40 eV for the feature identified at 2a confidence level as piperine.

**Table S12:** Piperine: library fragments and average mass error

| Library Fragment<br>m/z* | Average mass<br>error (ppm) |
|--------------------------|-----------------------------|
| 286.1437                 | -4.71791                    |
| 201.054                  | 2.238205                    |
| 135.0431                 | -2.22151                    |

\*Library spectrum from MassBank Europe:

<https://massbank.eu/MassBank/Result.jsp?inchikey=MXXWOMGUGJBKIW-YPCIICBESA-N>
